# Supplementary material
Source: Springer Nature journal article supplement (https://www.springermedizin.de/resource/supplementary/12950_2009_125_MOESM1_ESM.pdf/9558132)

### 1A. Pro-inflammatory markers

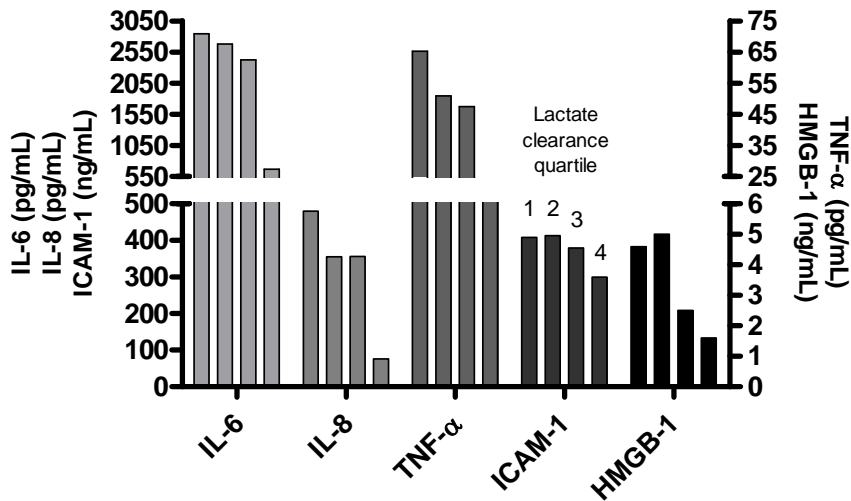

### 1B. Anti-inflammatory, coagulation, and apoptosis markers

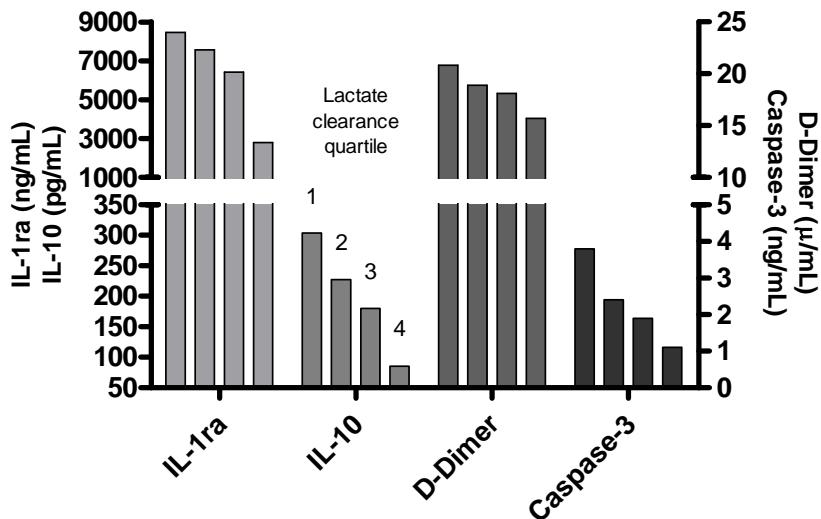

Supplement: MOESM1 [file 9558132]
